# Supplementary material for: Mendelian randomization while jointly modeling cis genetics identifies causal relationships between gene expression and lipids
Source: PubMed Central journal article supplement (PMC7530717; doi:10.1038/s41467-020-18716-x), 2020-10-01
Supplement: 41467_2020_18716_MOESM4_ESM.pdf [file 41467_2020_18716_MOESM4_ESM.pdf]

## Description of Additional Supplementary Files

### Supplementary Data 1

#### Overlap between genes and variants identified by FINEMAP

This table reports how often eQTL variants of a gene are in LD with eQTL variants of another gene, based on variant configurations identified by FINEMAP (Methods) at different posterior inclusion probabilities (PIP) or at the top configuration (top\_config) (column named PIP\_levels). We distinguish between `gene\_overlap` and `full\_gene\_overlap` (column named type\_of\_test). `gene\_overlap` describes if at least one variant in the configuration(s) overlaps with at least one variant in a configuration of another gene, while `full\_gene\_overlap` describes how often all the variants in the selected configuration(s) for all genes are overlapping or in LD according to a given  $r^2$  LD threshold, threshold indicated in column LD\_threshold\_r\_2. The number of genes with overlap at that specific threshold, configuration and test is shown in column number\_within\_LD\_range and the percentage over the total genes (column percentage\_of\_total).

### Supplementary Data 2

#### False positive rates and power of different MR methods and IV selection when no pleiotropy is simulated

Each row describes a simulation scenario and the corresponding detection rate using different approaches for IVs selection and different MR methods in a non-pleiotropic scenario ( $b_U = 0$ ) (Methods). Simulation scenarios were varied by the (1) number of simulated causal SNPs (column n\_causal), (2) causal effect of the known exposure (column exposure\_1\_causal) and (3) MR estimation method (column estimation\_method). The approach for IV selection (column selection\_method) varied between GCTA COJO (COJO) and p value clumping (clumped). Results are indicated in the last three columns, specifically: the median number of IVs identified by the selection method (column median\_ivs\_identified), how often (out of 1,500 simulations) an estimation was made (column number\_of\_simulations) and how often a method identifies a significant effect at  $\alpha = 0.05$  (column detection\_rate). Note that detection rate is equivalent to false positive rate when exposure\_1\_causal = 0 and equivalent to detection power otherwise. See the Supplementary Notes 1 for an explanation of the MR methods MR-link OLS, MR-link ridge and MR-link ridge p calibrated. Significance for the other MR methods is determined using a two sided Wald test in the case of IVW, and a two sided T test in the case of MR-Egger, MR-PRESSO and LDA-MR-Egger.

### Supplementary Data 3

#### False positive rate and power of different MR methods when pleiotropy through linkage disequilibrium is simulated

Each row describes a simulation scenario and the corresponding detection rate for different MR methods in a pleiotropic scenario ( $b_U = 0.4$ ) (Methods). Simulation scenarios were varied by the (1) the number of simulated causal SNPs (column n\_causal), (2) causal effect of the known exposure (column exposure\_1\_causal) and (3) MR estimation method (column estimation\_method). Other columns indicate: the median number of IVs identified by GCTA-COJO (column median\_ivs\_identified), how often (out of 1,500 simulations) an estimate was made (column number\_of\_simulations) and how often a method identifies a significant effect at  $\alpha = 0.05$  (column detection\_rate). Note that detection rate is equivalent to false

positive rate when  $\text{exposure\_1\_causal}=0$  and equivalent to detection power otherwise. See the Supplementary Notes 1 for an explanation of the MR methods MR-link OLS, MR-link ridge and MR-link ridge p calibrated. Significance for the other MR methods is determined using a two sided Wald test in the case of IVW, and a two sided T test in the case of MR-Egger, MR-PRESSO and LDA-MR-Egger.

#### Supplementary Data 4

False positive rate and power of different MR methods when pleiotropy through overlap is simulated

Each row describes a simulation scenario and the corresponding detection rate for different MR methods in a pleiotropic scenario ( $b_U = 0.4$ ) with 10 simulated causal SNPs and an increasing number of overlapping pleiotropic SNPs (Methods). The first columns indicate (1) the causal effect of the known exposure (column  $\text{exposure\_1\_causal}$ ), (2) the MR estimation method (column  $\text{estimation\_method}$ ) and (3) the number of causal variants that overlap between the known and the pleiotropic exposure (column  $\text{overlapping\_causal}$ ). The other columns indicate: the median number of IVs identified by the GCTA-COJO (column  $\text{median\_ivs\_identified}$ ), how often (out of 1,500 simulations) an estimate was made (column  $\text{number\_of\_simulations}$ ) and how often a method identifies a significant effect at  $\alpha = 0.05$  (column  $\text{detection\_rate}$ ). Note that detection rate is equivalent to false positive rate when  $\text{exposure\_1\_causal} = 0$  and equivalent to detection power otherwise. See the Supplementary Notes 1 for an explanation of the MR methods MR-link OLS, MR-link ridge and MR-link ridge p calibrated. Significance for the other MR methods is determined using a two sided Wald test in the case of IVW, and a two sided T test in the case of MR-Egger, MR-PRESSO and LDA-MR-Egger.

#### Supplementary Data 5

Discriminative ability of coloc methods and MR-link in simulations

Each row describes the discriminative ability in terms of area under the receiver operator characteristic curve (AUC) comparing the scenario with no causal effect  $b_E = 0$  with a scenario where there is a causal effect  $b_E \neq 0$  (column  $\text{exposure\_1\_causal}$ ).

Simulations were varied in the number of simulated causal variants (column  $n\_causal$ ), presence ( $b_U = 0.4$ ) or absence ( $b_U = 0$ ) of pleiotropy (column  $\text{exposure\_2\_causal}$ ) and the level of pleiotropy through overlap (column  $\text{overlapping\_causal}$ ), where zero means full pleiotropy through linkage disequilibrium (LD) and 10 means full pleiotropy through overlap between observed and unobserved exposure. MR-link and IVW were compared to three coloc methods for discriminative ability (column  $\text{estimation\_method}$ ) in terms of the AUC (column AUC). See Methods for specifics of the simulations and how the AUC was calculated.

#### Supplementary Data 6

False positive rate and power for coloc methods in simulations

Each row describes a simulation scenario and the corresponding detection rate for three different coloc methods in all simulation scenarios (Methods). The first 5 columns indicate the simulation parameters: (1) the number of simulated causal SNPs (column  $n\_causal$ ) (2) the causal effect of the known exposure (column  $\text{exposure\_1\_causal}$ ), (3) the presence of a pleiotropic effect (column  $\text{exposure\_2\_causal}$ ), (4) the coloc estimation method (column  $\text{estimation\_method}$ ) and (5) the number of causal variants that overlap between the known and the

pleiotropic exposure (column overlapping\_causal). The other columns indicate results: how often (out of 1,500 simulations) an estimate was made (column number\_of\_simulations) and how often the coloc method identifies sharing of causal variants at coloc PP4 > 0.9 (the maximum is taken if there is more than 1 coloc estimate) (column detection\_rate). Note that detection rate is equivalent to false positive rate when exposure\_1\_causal = 0 and equivalent to power otherwise.

#### Supplementary Data 7

False positive rates and power of MR-link when using a different p value calibration procedure

Each row describes a simulation scenario and the corresponding detection rate for MR-link when p values are calibrated based on a heterogeneous distribution of p values (The scenarios without pleiotropic effect and pleiotropy through linkage disequilibrium combined) (Supplementary Notes 1). The first columns indicate the simulation parameters: (1) the number of causal variants simulated (column ) (2) the causal effect of the known exposure (column exposure\_1\_causal), (3) the pleiotropic effect (column exposure\_2\_causal) The other columns indicate results of the simulations: the median number of IVs identified by the GCTA-COJO (column median\_ivs\_identified), how often (out of 1,500 simulations) an estimate was made (column number\_of\_simulations) and how often a method identifies a significant effect at alpha = 0.05 (column detection\_rate). Note that detection rate is equivalent to false positive rate when exposure\_1\_causal = 0 and equivalent to detection power otherwise. Significance for MR-link was determined based on a calibrated p value as described in Supplementary Notes 1.
